# Supplementary material for: Indirect Negative Effect of Mutant Ataxin-1 on Short- and Long-Term Synaptic Plasticity in Mouse Models of Spinocerebellar Ataxia Type 1
Source: MDPI journal article supplement (doi:10.3390/cells11142247), 2022-07-20
Supplement: s1 [file s1]

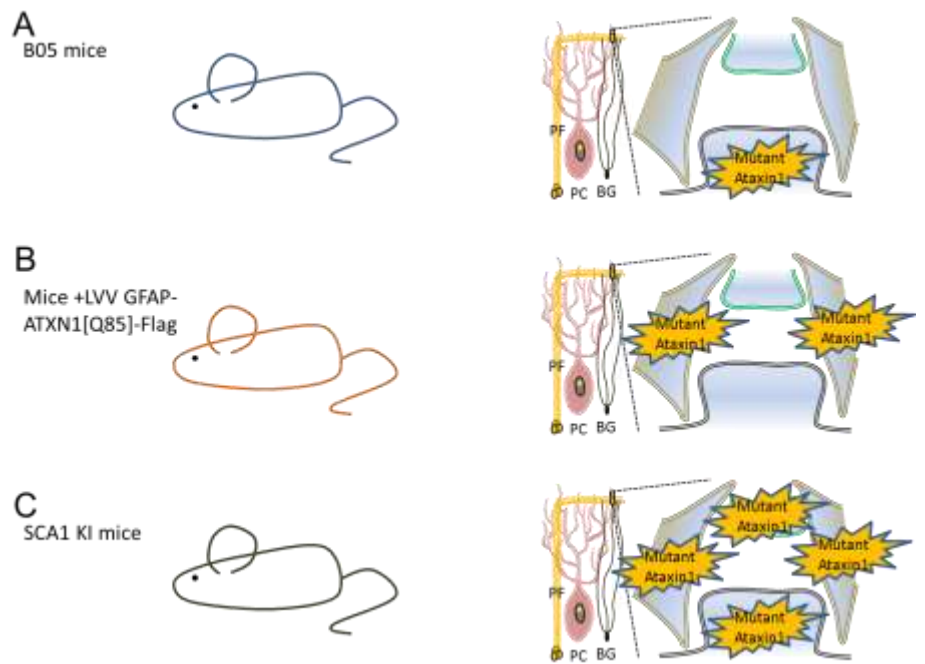

**Figure S1.** SCA1 models with different distribution of mutant Ataxin-1 in the tripartite PF-PC synapse. (A) B05 mice express ATXN1[Q82] selectively in PCs. (B) Mice with selective expression of ATXN1[Q85] in BG. (C) SCA1 KI mice that express ATXN1[Q154] in a nonselective manner in all units of the tripartite synapse.

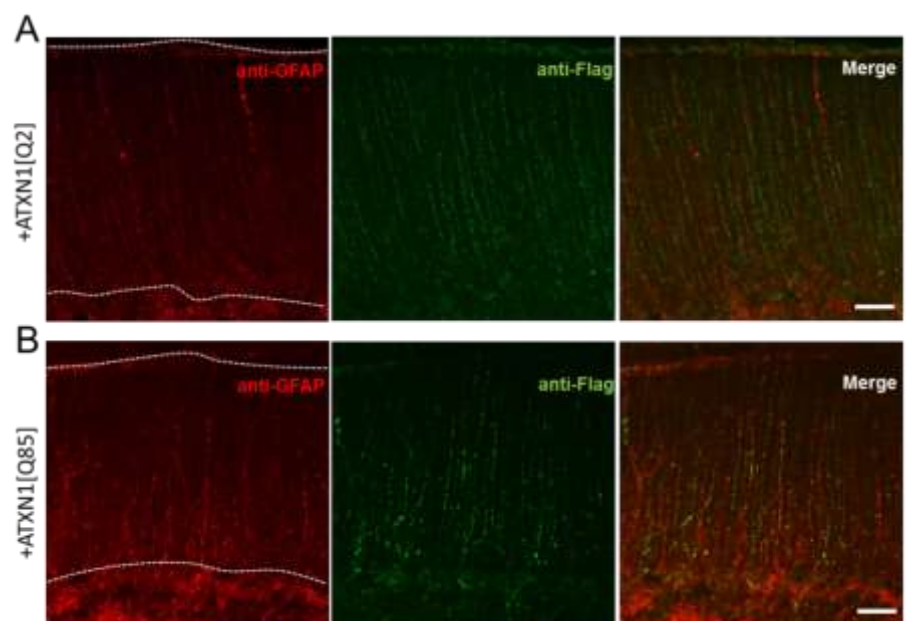

**Figure S2.** Expression of LVV constructions in BG. Confocal images of cerebellar cortex that express (A) ATXN1[Q2] (upper panel) and (B) ATXN1[Q85] (lower panel) in processes labeled by anti-GFAP (red) and anti-Flag antibodies (green). ML is marked by dotted lines. Scale bar 50  $\mu$ m.
